# Supplementary material for: Molecular investigations on Candida glabrata clinical isolates for pharmacological targeting
Source: Royal Society of Chemistry journal article supplement (doi:10.1039/d2ra02092k), 2022-01-01
Supplement: d2ra02092k1.pdf [file d2ra02092k1.pdf]

## **SUPPLEMENTARY MATERIAL**

### **Molecular investigations on *Candida glabrata* clinical isolates for pharmacological targeting**

**Hrishikesh Gupta<sup>a#</sup>, Payal Gupta<sup>a#</sup>, Manikyaprabhu Kairamkonda<sup>a</sup>, Krishna Mohan  
Poluri<sup>\*a,b</sup>**

<sup>a</sup>Department of Biosciences and Bioengineering, Indian Institute of Technology Roorkee,  
Roorkee – 247667, Uttarakhand, India

<sup>b</sup>Centre for Nanotechnology, Indian Institute of Technology Roorkee, Roorkee – 247667,  
Uttarakhand, India

**Running Title:** Molecular characterization of *Candida glabrata* isolates

**\*Corresponding Author:**

Dr. Krishna Mohan Poluri  
Department of Biosciences and Bioengineering  
Indian Institute of Technology Roorkee (IIT-Roorkee)  
Roorkee- 247667, Uttarakhand, INDIA  
Email: [krishna.poluri@bt.iitr.ac.in](mailto:krishna.poluri@bt.iitr.ac.in) / [mohanpmk@gmail.com](mailto:mohanpmk@gmail.com)

[#Authors contributed equally](#)

**Figure S1:** Growth pattern of *C. glabrata* strains. Colony forming units (CFU) mL<sup>-1</sup> determined from samples collected at specific time intervals from cultures grown at 37 °C. Data expressed as mean ± SD (n = 3).

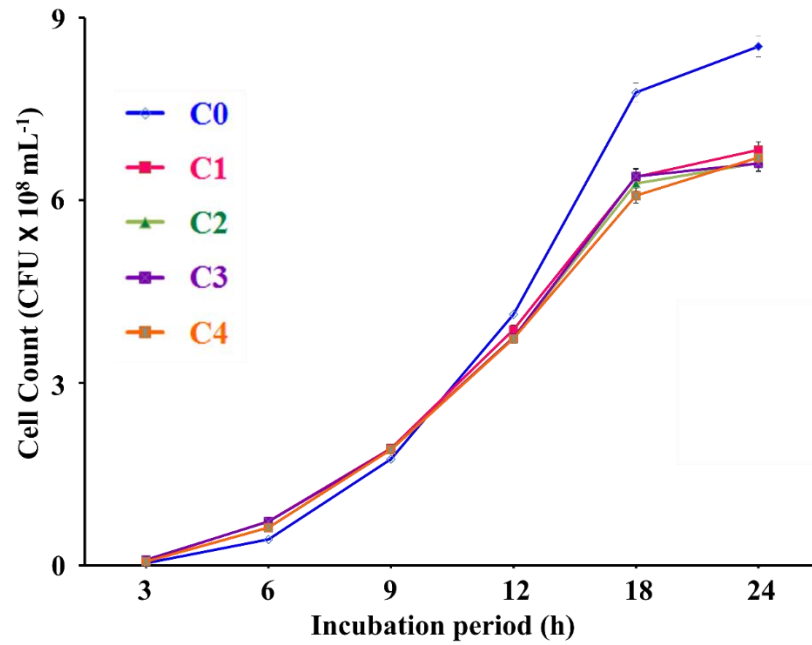

**Figure S2:** Light microscopy images of all strains captured at 40X (Scale = 50  $\mu\text{m}$ ). *C. glabrata* wild-type strain (C0), and clinical isolates (C1-C4).

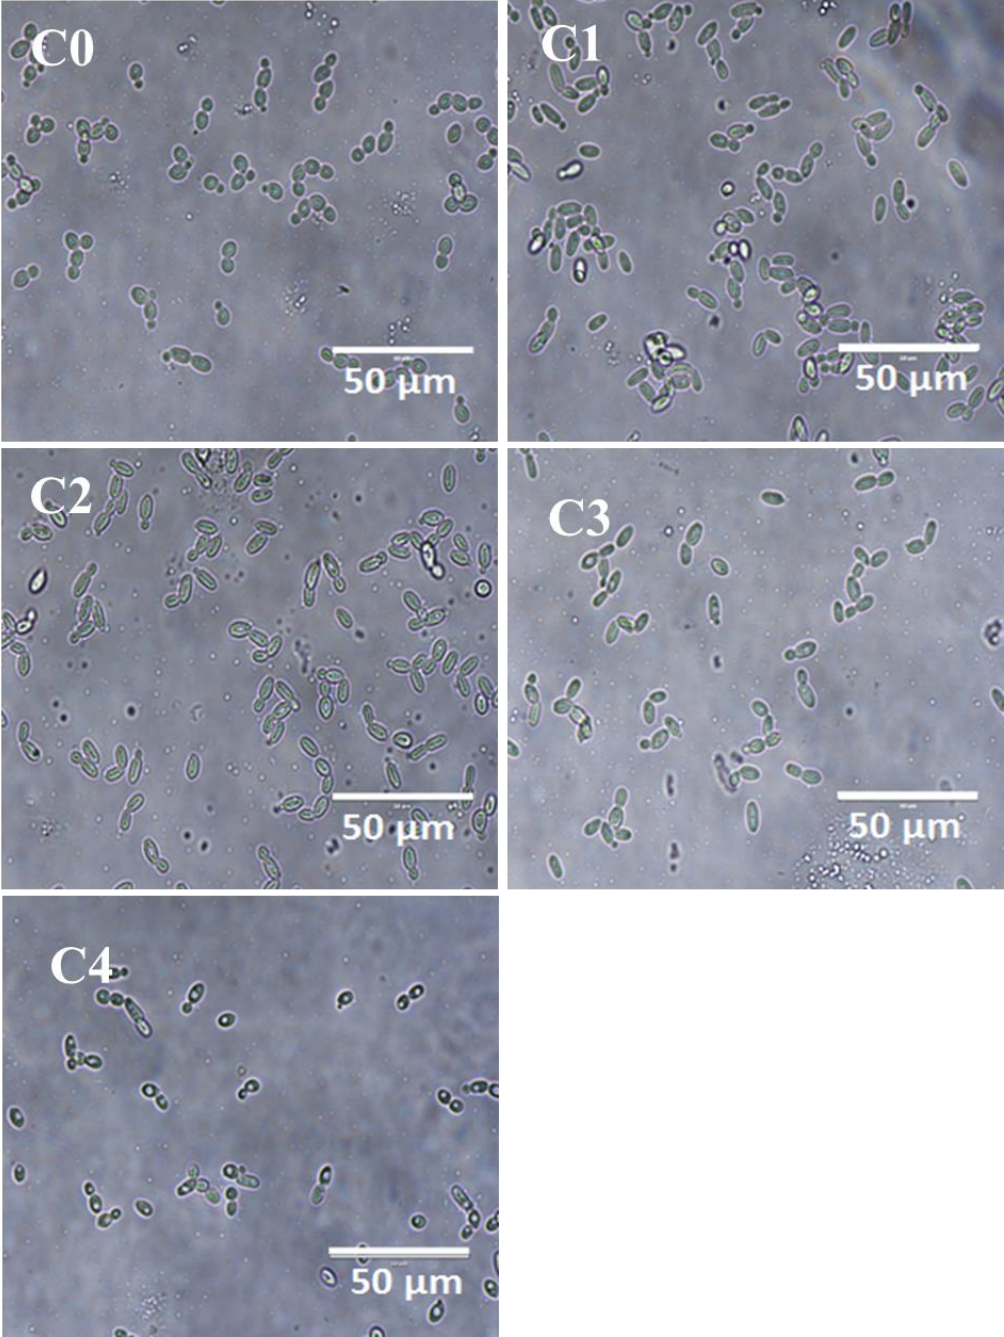

**Figure S3:** Morphological and biochemical characterization of *C. glabrata*. **A)** Mean size of *C. glabrata* strains as measured along the large ellipsoid axis of budding cells using Image J software. The data is expressed as mean  $\pm$  SD (n = 100). **B)** Surface charge (zeta potential, mV  $\pm$  SD, n = 3) analysis of all strains. **C)** Ergosterol content of cell wall expressed as % ergosterol (mean  $\pm$  SD, n = 3). *C. glabrata* wild-type strain (C0), and clinical isolates (C1-C4).

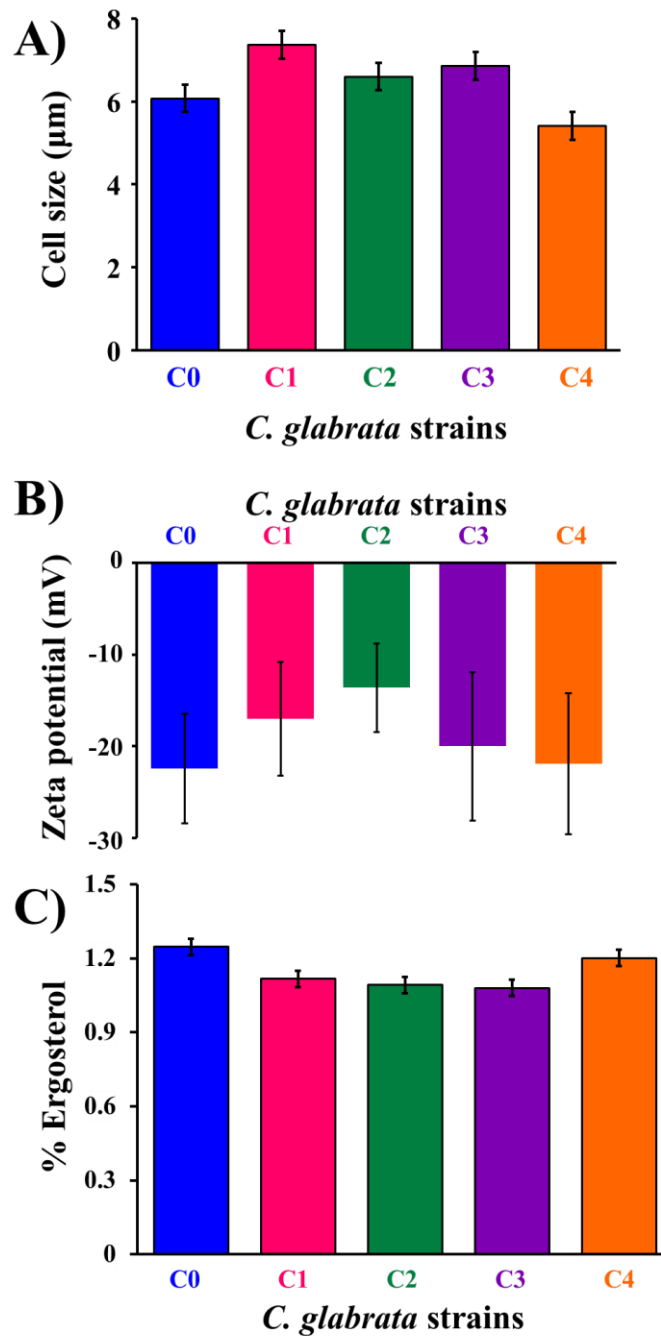

**Figure S4:** Principal Component Analysis (PCA) scores plot of metabolomics data representing the group discrimination. *C. glabrata* wild-type strain (C0), and clinical isolates (C1-C4).

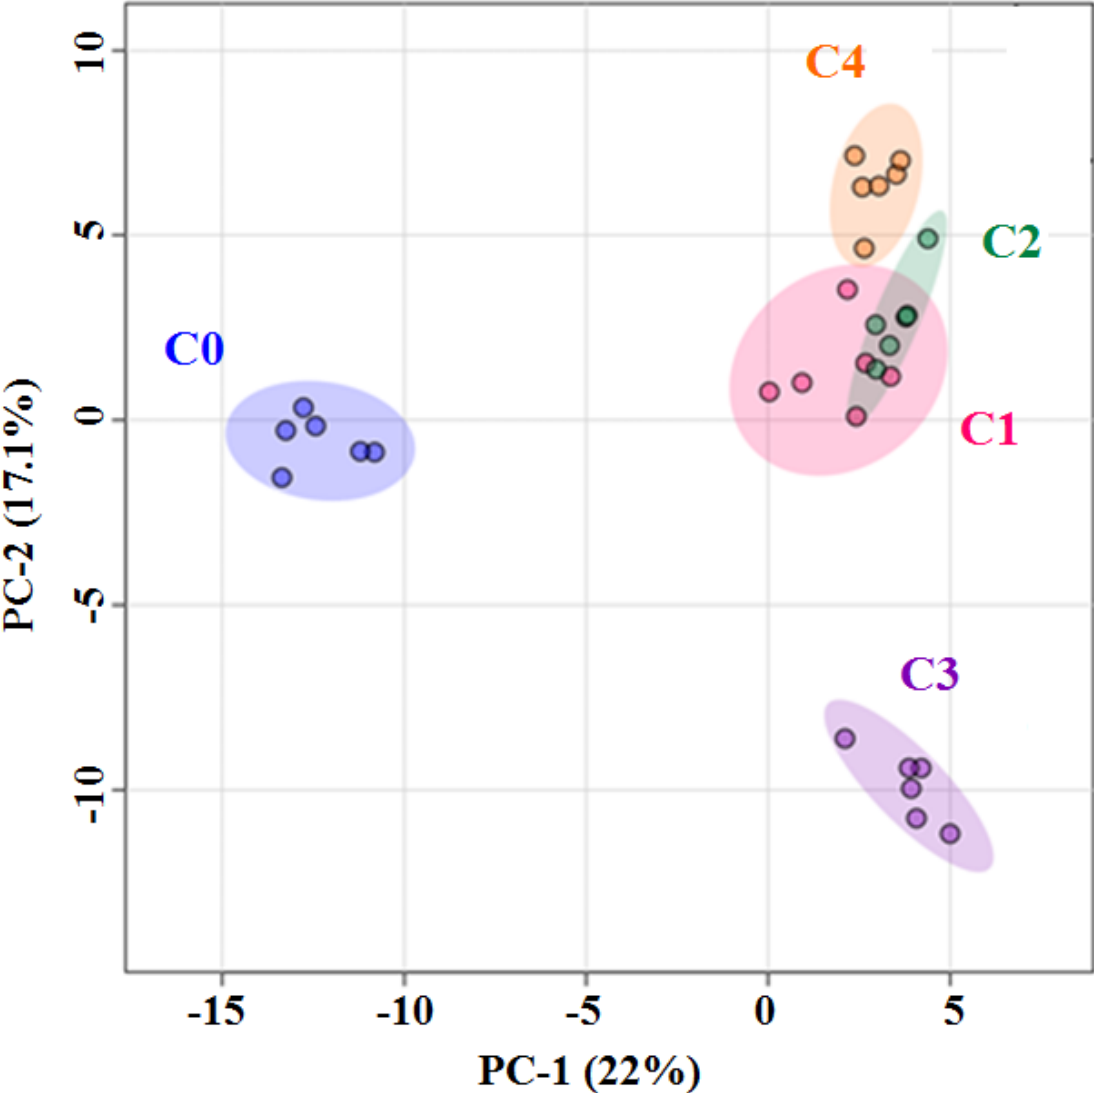

**Figure S5:** Cross validation of PLS-DA model performance generated from spectral data. The bars represent accuracy, goodness of fit ( $R^2$ ) and predictability ( $Q^2$ ) determined during cross validation. The red asterisk mark indicates optimum predictability.

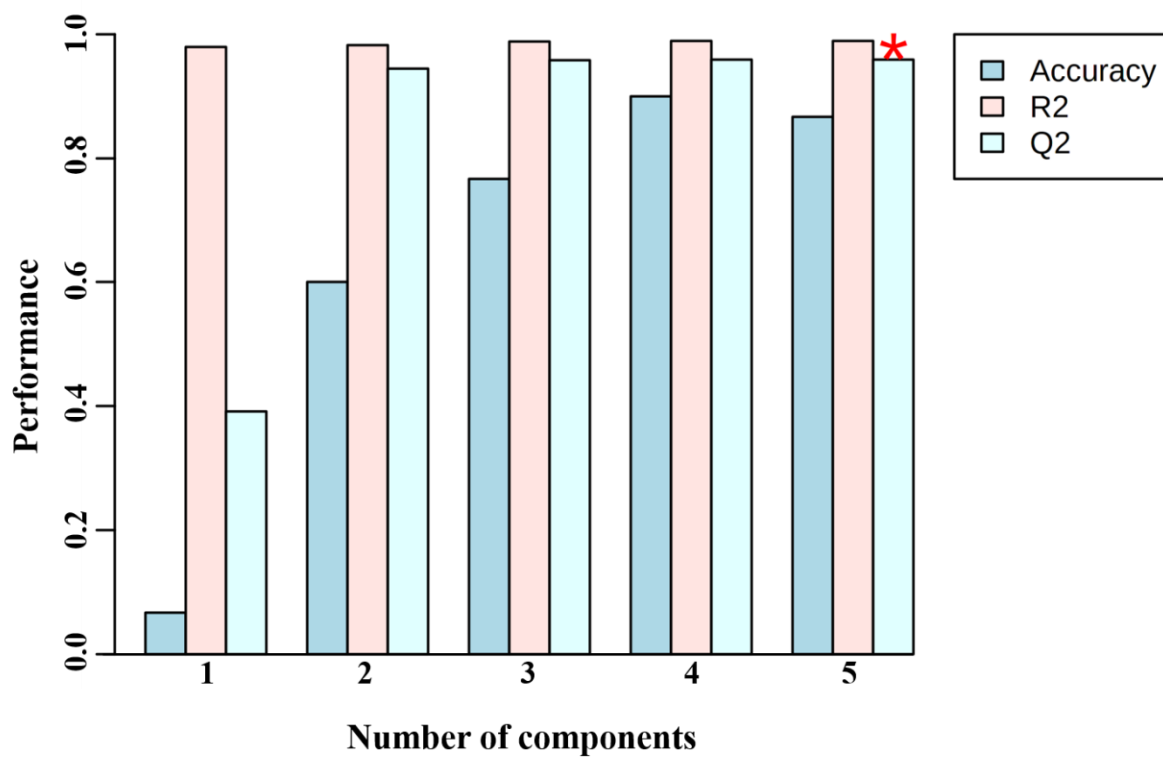

**Figure S6:** Heatmap showing the pattern of distribution of top 18 significant metabolites (as per VIP score), and involved in group discrimination among the chosen *C. glabrata* groups. *C. glabrata* wild-type strain (C0), and clinical isolates (C1-C4). The dark maroon and dark blue colours represent highest up and down fold change in the metabolites respectively as described in the scale bar.

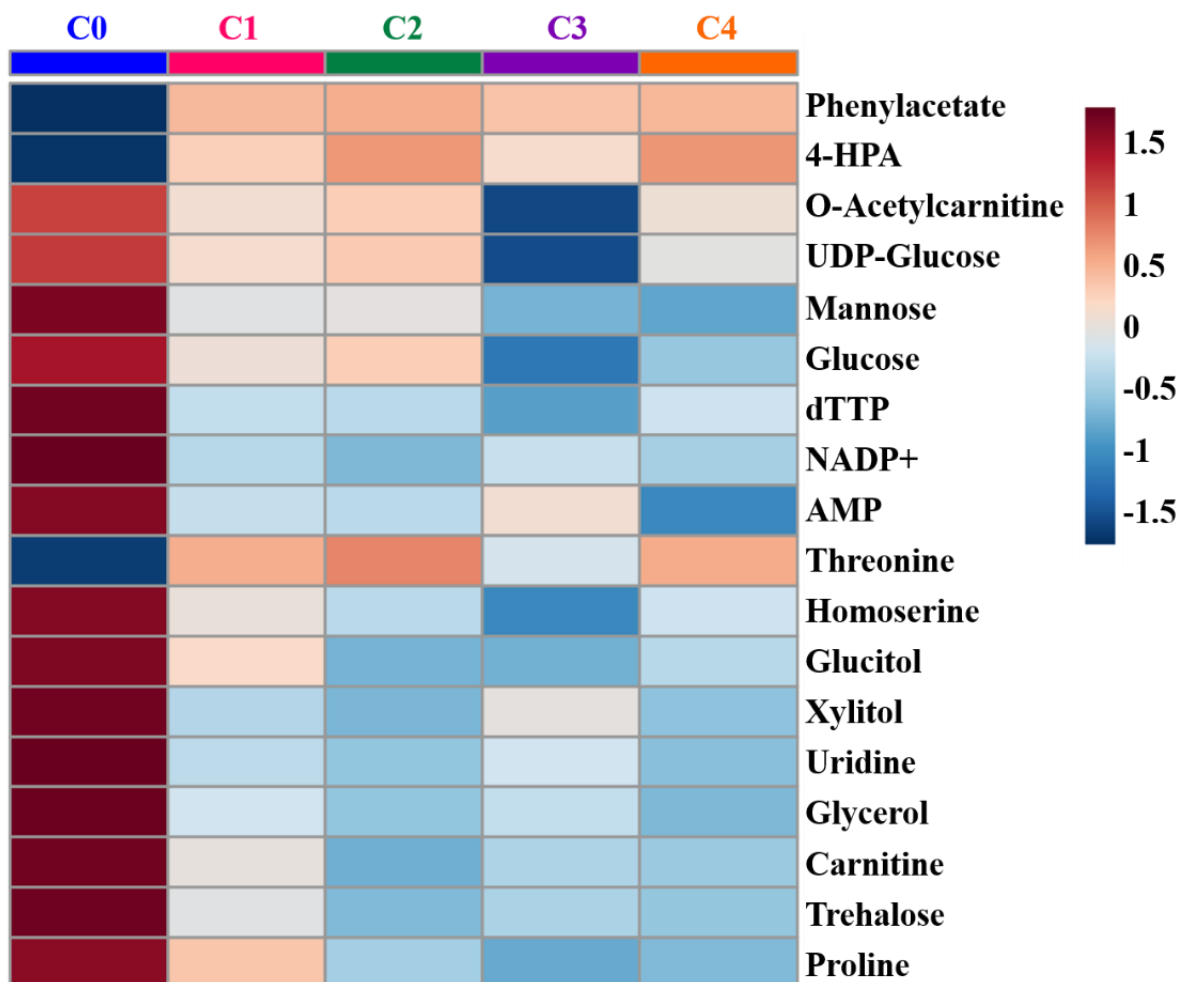

**Table S1:** Sequence of Primers used for RT-PCR analysis

| S No | Enzyme                                                    | Code         | Gene      | Sequence 5'-3'           | Amplicon size (bp) |
|------|-----------------------------------------------------------|--------------|-----------|--------------------------|--------------------|
| 1    | Phosphatidylserine decarboxylase                          | CAGL0I08745g | PSD2 (F)  | TGCCCAGTAGTGATGAAGTTATG  | 102                |
|      |                                                           |              | PSD2 (R)  | ATGTGGACTTCCGCTCTTAATC   |                    |
| 2    | Lysophospholipidacyltransferase                           | CAGL0L04642g | ALE1 (F)  | GTCTAGCTACCAGAAGTCGAAAG  | 100                |
|      |                                                           |              | ALE1 (R)  | ACTTGGGCCTGTTAGGATTG     |                    |
| 3    | Acetyl-CoA carboxylase                                    | CAGL0L10780g | HFA1(F)   | CCTCGTGGTAGACAGTTTGT     | 117                |
|      |                                                           |              | HFA1 (R)  | GCCTCTCTTTCTGGCATAGTT    |                    |
| 4    | Fatty acid elongase 3                                     | CAGL0G04851g | SUR4 (F)  | CTTGACCTCCATCTCTTTCATACT | 94                 |
|      |                                                           |              | SUR4 (R)  | GGAACAGATAGCCCAGAACAA    |                    |
| 5    | Hydroxymethylglutaryl-CoA synthase                        | CAGL0H04081g | ERG13 (F) | AACTACAGGGCAAGCGTATC     | 101                |
|      |                                                           |              | ERG13 (R) | GCTGACTATGTCGCTGATGT     |                    |
| 6    | Phosphoglycerate kinase                                   | CAGL0L07722g | PGK1 (F)  | GCTTTGCCAACCATCAAGTATG   | 117                |
|      |                                                           |              | PGK1 (R)  | CAACTGGAGCCAAGGAGTATTT   |                    |
| 7    | Glucose-6-phosphate isomerase                             | CAGL0H05445g | PGI1 (F)  | GGGTTCCCTTGATTGCCTACTAC  | 106                |
|      |                                                           |              | PGI1 (R)  | AGCCAAGACCTTACCCAATTC    |                    |
| 8    | 1,4-alpha-glucan branching enzyme                         | CAGL0M03377g | GLC3 (F)  | TCATTACAGTCACGCATCTAA    | 97                 |
|      |                                                           |              | GLC3 (R)  | CCTCTACCAGAAGTCAAGGAATG  |                    |
| 9    | Trehalose 6-phosphate synthase complex regulatory subunit | CAGL0J06468g | TSL1 (F)  | CCGCAGAGGATTTCTTCACTAC   | 100                |
|      |                                                           |              | TSL1 (R)  | GCATTGATTTCCGGTGCTATTG   |                    |
| 10   | Trehalose 6-phosphate synthase/phosphatase                | CAGL0G05335g | TPS2 (F)  | TGGTCAACTCCATCAACTCAA    | 108                |
|      |                                                           |              | TPS2 (R)  | CAGCAACTCTCAGCAAGGATAG   |                    |
| 11   | Glucoamylase                                              | CAGL0G02717g | SGA1 (F)  | AGCGCTCGGGTTTAGATATTG    | 101                |
|      |                                                           |              | SGA1 (R)  | GCGGTTGTCCACATGAAATAAG   |                    |
| 12   | Argininosuccinatesynthase                                 | CAGL0C05115g | ARG1 (F)  | CCCACCAAAGGATATGTGGAAG   | 126                |
|      |                                                           |              | ARG1 (R)  | CCAGTAGCGTTGTCTTGTATG    |                    |
| 13   | Argininosuccinatelyase                                    | CAGL0I08987g | ARG4 (F)  | GAGGACATCCACACTGCTAAT    | 106                |
|      |                                                           |              | ARG4 (R)  | CCGTGACAACCTGGTCATTC     |                    |
| 14   | Arginase                                                  | CAGL0J07062g | CAR1 (F)  | GGTGAAGCCACTGAACTTATCT   | 123                |
|      |                                                           |              | CAR1 (R)  | CTTGTCCAAAGCAGCAGAAAC    |                    |
| 15   | Asparagine synthase (glutamine-hydrolysing)               | CAGL0I10648g | ASN2 (F)  | TCTATCGCTGCTCGTGAAAC     | 127                |
|      |                                                           |              | ASN2 (R)  | GAGACCAACCAGCAGTATGTAG   |                    |
| 16   | ATP-binding cassette, subfamily B (MDR/TAP), member 1     | CAGL0K00363g | STE6 (F)  | CTGTGGATATGCGTCAGAGAAT   | 107                |
|      |                                                           |              | STE6 (R)  | CGTGTTACGGATGAACTCTAGG   |                    |
| 17   | β-actin/housekeeping gene                                 | CAGL0K12694g | ACT1 (F)  | TTACCAACTGGGATGACATGGA   | 100                |
|      |                                                           |              | ACT1 (R)  | GGAGCCTCGGTCAACAAGAC     |                    |



**Table S2:** List of metabolites identified from the 1D <sup>1</sup>H-NMR spectra recorded from intracellular metabolite extract of all the *C. glabrata* strains. (Peak type: s = singlet, d = doublet, t = triplet, q = quadruplet, m = multiplet). *C. glabrata* wild-type strain (C0), and clinical isolates (C1-C4).

| S. No                   | Metabolite Name | Assignment                                        | Chemical shifts (δ) in ppm with peak type                                      |
|-------------------------|-----------------|---------------------------------------------------|--------------------------------------------------------------------------------|
| <b>Amino Acids (24)</b> |                 |                                                   |                                                                                |
| 1                       | Alanine         | C6H3<br>C4H                                       | 1.45*(d)<br>3.76(q)                                                            |
| 2                       | Alloisoleucine  | C9H3<br>C8H3<br>C7H2<br>C6H<br>C4H                | 0.92 (d)<br>0.95 (q)<br>1.31/1.42 (m)<br>2.05 (m)<br>3.73 (d)                  |
| 3                       | Arginine        | N9H<br>N11H, N12H2<br>C4H<br>C8H2<br>C6H2<br>C7H2 | 7.22 (s)<br>6.66 (s)<br>3.76 (q)<br>3.23 (m)<br>1.92/1.88 (m)<br>1.71/1.63 (m) |
| 4                       | Asparagine      | C6H2<br>C4H<br>N9H2<br>N5H2                       | 2.84/2.94 (m)<br>4.00 (m)<br>6.90 (s)<br>7.62 (s)                              |
| 5                       | Betaine         | C3H2<br>C5H3&C7H3& C8H3                           | 3.87(s)<br>3.24(s)                                                             |
| 6                       | Carnitine       | β-CH<br>γ-CH2<br>N <sup>+</sup> 3 (CH3)<br>α-CH2  | 4.56 (m)<br>3.44 & 3.38 (m)<br>3.20 (t)<br>2.43 (q) & 2.40 (q)                 |
| 7                       | Citrulline      | N3H<br>C7H<br>C4H2<br>C6H2<br>C5H2                | 6.37 (q)<br>3.74(q)<br>3.14/3.12 (m)<br>1.88/1.84 (m)<br>1.59/ 1.52 (m)        |
| 8                       | Cysteine        | C3H<br>C2H2                                       | 3.97 (q)<br>3.09/ 3.02 (q)                                                     |
| 9                       | Cystine         | C4H/C7H<br>C3H2/C6H2                              | 4.10 (q)<br>3.39/ 3.17 (q)                                                     |
| 10                      | Glutamate       | C4H<br>C7H2<br>C6H2                               | 3.75(m)<br>2.34(m),2.30(m)<br>2.12(m),2.04(m)                                  |
| 11                      | Glutamine       | N10H2<br>N5H2<br>C4H<br>C7H2<br>C6H2              | 7.58 (s)<br>6.87 (s)<br>3.76 (q)<br>2.46/ 2.40 (m)<br>2.14/ 2.10 (m)           |
| 12                      | Glutathione     | N4H<br>N13H<br>C3H<br>C14H2<br>C11H               | 8.49 (d)<br>8.24 (q)<br>4.58 (m)<br>3.78/ 3.77 (q)<br>3.75 (q)                 |

|                            |                           |                                                  |                                                                                        |
|----------------------------|---------------------------|--------------------------------------------------|----------------------------------------------------------------------------------------|
|                            |                           | C2H2<br>C9H2<br>C10H2                            | 2.97/ 2.92 (q)<br>2.56/ 2.52 (m)<br>2.16/ 2.13 (m)                                     |
| 13                         | Glycine                   | C4H2                                             | 3.54 (s)                                                                               |
| 14                         | Homoserine                | C4H2<br>C2H2<br>C3H2                             | 3.84 (q)<br>3.75 (m)<br>2.12 (m) & 2.01 (m)                                            |
| 15                         | Isoleucine                | C4H<br>C6H<br>C7H2<br>C9H3<br>C8H3               | 3.66 (d)<br>1.96 (m)<br>1.45/1.24 (m)<br>0.99 (d)<br>0.92 (q)                          |
| 16                         | Leucine                   | C4H<br>C6H2<br>C7H<br>C8H3<br>C9H3               | 3.72 (q)<br>1.73 & 1.66 (m)<br>1.69 (m)<br>0.95 (d)<br>0.94 (d)                        |
| 17                         | Methionine                | C5H<br>C3H<br>C2H3<br>C4H2                       | 3.85 (q)<br>2.64 (m)<br>2.12 (s)<br>2.10/2.19 (m)                                      |
| 18                         | O-Acetylcarnitine         | C5H<br>C9H2<br>C11/13/14-H3<br>C4H2<br>C12H3     | 5.58 (m)<br>3.83, 3.59 (m)<br>3.17 (t)<br>2.63, 2.49 (q)<br>2.13 (s)                   |
| 19                         | Ornithine                 | C4H<br>C8H2<br>C6H2<br>C7H2                      | 3.77 (m)<br>3.05 (q)<br>1.93 (m)<br>1.82/1.73 (m)                                      |
| 20                         | Proline                   | C5H<br>C2H2<br>C3H2<br>C4H2                      | 4.10 (q)<br>3.41/3.31 (m)<br>1.97/2.02 (m)<br>2.05/2.32 (m)                            |
| 21                         | Serine                    | C3H<br>C2H2                                      | 3.83 (dd)<br>3.94 (q)/3.97 (q)                                                         |
| 22                         | Taurine                   | C5H2<br>C6H2                                     | 3.41 (m)<br>3.25 (m)                                                                   |
| 23                         | trans-4-Hydroxy-L-proline | C5H<br>C3H<br>C2H2<br>C4H2                       | 4.66 (m)<br>4.33 (m)<br>3.49/3.36 (m)<br>2.42/2.14 (m)                                 |
| 24                         | Valine                    | C4H<br>C6H<br>C7H3<br>C8H3                       | 3.60 (d)<br>2.26 (m)<br>1.01 (d)<br>0.96 (d)                                           |
| <b>Nitrogen bases (15)</b> |                           |                                                  |                                                                                        |
| 25                         | Adenine                   | C2H<br>C6H                                       | 8.21 (s)<br>8.17 (s)                                                                   |
| 26                         | Adenosine                 | C7H<br>C12H<br>C2H<br>C3H<br>C4H<br>C5H<br>C17H2 | 8.34 (s)<br>8.24 (s)<br>6.06 (d)<br>4.79 (q)<br>4.42 (q)<br>4.30 (m)<br>3.83/3.91 (dd) |

|    |           |                                                       |                                                                                            |
|----|-----------|-------------------------------------------------------|--------------------------------------------------------------------------------------------|
| 27 | ADP       | C7H<br>C12H<br>C2H<br>C3H<br>C4H<br>C5H<br>C17H2      | 8.50 (s)<br>8.25 (s)<br>6.13 (d)<br>4.77 (q)<br>4.56 (q)<br>4.37 (m)<br>4.24/4.20 (m)      |
| 28 | AMP       | C7H<br>C12H<br>C2H2<br>C3H<br>C4H<br>C5H<br>C17H2     | 8.58 (s)<br>8.24 (s)<br>6.11 (d)<br>4.77 (q)<br>4.48 (q)<br>4.35 (m)<br>4.04/4.01 (m)      |
| 29 | ATP       | C7H<br>C12H<br>C2H<br>C3H<br>C4H<br>C5H<br>C17H2      | 8.50 (s)<br>8.24 (s)<br>6.12 (d)<br>4.76 (q)<br>4.56 (q)<br>4.39 (m)<br>4.27/4.23 (m)      |
| 30 | Cytidine  | C11H<br>C10H<br>C2H<br>C3H<br>C4H<br>C5H<br>C14H2     | 7.84 (d)<br>6.05 (q)<br>5.90 (q)<br>4.29 (q)<br>4.19 (q)<br>4.11 (m)<br>3.91/3.80 (q)      |
| 31 | Cytosine  | C4H<br>C5H                                            | 7.50 (d)<br>5.96 (d)                                                                       |
| 32 | dTTP      | C11H<br>C2H<br>C4H<br>C5H<br>C13H2<br>C3H2<br>C19H3   | 7.68 (q)<br>6.31 (q)<br>4.73 (m)<br>4.61 (m)<br>4.22/4.18 (m)<br>2.35/2.38 (m)<br>1.91 (d) |
| 33 | GTP       | C7H<br>N22H2<br>C2H<br>C3H<br>C4H<br>C5H<br>C17H2     | 8.14 (s)<br>6.39 (s)<br>5.93 (d)<br>4.72 (q)<br>4.54 (q)<br>4.35 (m)<br>4.25/4.22 (m)      |
| 34 | Inosine   | C7H<br>C12H<br>C2H<br>C3H<br>C4H<br>C5H<br>C17H2      | 8.33 (s)<br>8.22 (s)<br>6.08 (d)<br>4.76 (q)<br>4.43 (q)<br>4.26 (m)<br>3.90/3.83 (q/q)    |
| 35 | Thymidine | C11H<br>C2H2<br>C4H2<br>C5H<br>C13H2<br>C3H2<br>C17H3 | 7.63 (q)<br>6.28 (q)<br>4.46 (m)<br>4.01 (m)<br>3.83/3.75 (q)<br>2.36/2.36 (q)<br>1.88 (d) |
| 36 | Thymine   | C6H<br>C9H3                                           | 7.35 (q)<br>1.86 (d)                                                                       |
| 37 | Uracil    | C6H<br>C5H                                            | 7.51 (d)<br>5.77 (d)                                                                       |

|                           |                        |                                                   |                                                                                           |
|---------------------------|------------------------|---------------------------------------------------|-------------------------------------------------------------------------------------------|
| 38                        | Uridine                | C11H<br>C2H<br>C10H<br>C3H<br>C4H<br>C5H<br>C14H2 | 7.84 (d)<br>5.90 (d)<br>5.89 (d)<br>4.34 (q)<br>4.21 (q)<br>4.12 (m)<br>3.90 (q)/3.79 (q) |
| 39                        | Xanthine               | C2H                                               | 7.92 (s)                                                                                  |
| <b>Organic Acids (22)</b> |                        |                                                   |                                                                                           |
| 40                        | 2-Aminobutyrate        | C7H3<br>C6H2<br>C4H                               | 0.98 (q)<br>1.88 (m)<br>3.70 (q)                                                          |
| 41                        | 2-Hydroxybutyrate      | C4H3<br>C3H2<br>C2H                               | 0.91 (q)<br>1.65 (m)&1.72 (m)<br>3.96 (q)                                                 |
| 42                        | 2-Oxoglutarate         | C4H2 & C5H2                                       | 2.42 (t) & 2.99 (t)                                                                       |
| 43                        | 4-Aminobutyrate        | C5H2<br>C4H2<br>C6H2                              | 1.88 (m)<br>2.28 (m)<br>3.00 (m)                                                          |
| 44                        | 4-Hydroxyphenylacetate | C3H/C5H<br>C2H/C6H<br>C8H2                        | 7.16 (m)<br>6.86 (m)<br>3.44 (q)                                                          |
| 45                        | Acetate                | C4H3                                              | 1.88(s)                                                                                   |
| 46                        | Aspartate              | C4H<br>C6H2                                       | 3.89 (q)<br>2.78/2.64 (q)                                                                 |
| 47                        | Citrate                | C2H2 & C5H2                                       | 2.52 (d) & 2.67 (d)                                                                       |
| 48                        | Formate                | C2H                                               | 8.42 (s)                                                                                  |
| 49                        | Fumarate               | C4aH&C5aH                                         | 6.48 (s)                                                                                  |
| 50                        | Glycolate              | C2H2                                              | 3.93 (s)                                                                                  |
| 51                        | Isocitrate             | C2H<br>C5H<br>C9H2                                | 4.03 (d)<br>2.98 (m)<br>2.54/2.49 (q)                                                     |
| 52                        | Isovalerate            | C4H2<br>C5H<br>C6H3 & C7H3                        | 2.04 (d)<br>1.94 (m)<br>0.90 (d)                                                          |
| 53                        | Lactate                | C2H<br>C3H3                                       | 4.10 (q)<br>1.30 (d)                                                                      |
| 54                        | Malate                 | C2H<br>C5H2                                       | 4.30 (q)<br>2.67 (q) & 2.36 (q)                                                           |
| 55                        | Malonate               | C4H2                                              | 3.10 (s)                                                                                  |
| 56                        | Methylmalonate         | C4H<br>C5H3                                       | 3.16 (q)<br>1.21 (d)                                                                      |
| 57                        | Phenylacetate          | C3H&C5H<br>C4H<br>C2H&C6H<br>C7H2                 | 7.36 (m)<br>7.29 (m)<br>7.28 (m)<br>3.52 (s)                                              |
| 58                        | Propionate             | C4H2<br>C5H3                                      | 2.15 (q)<br>1.02 (t)                                                                      |
| 59                        | Pyruvate               | C6H3                                              | 2.37 (s)                                                                                  |
| 60                        | Succinate              | C4H2, C5H2                                        | 2.40 (s)                                                                                  |
| 61                        | Tropate                | C2H, C3H<br>C4H, C5H<br>C1H<br>C6H2<br>C8H        | 7.39 (m)<br>7.35 (m)<br>7.31 (m)<br>4.06 (q)/3.85 (q)<br>3.68 (q)                         |

| Sugars and derivatives (13) |                     |                                                                        |                                                                                                                                       |
|-----------------------------|---------------------|------------------------------------------------------------------------|---------------------------------------------------------------------------------------------------------------------------------------|
| 62                          | Glucitol            | C3H<br>C9H<br>C2H2<br>C5H<br>C11H2<br>C7H                              | 3.81 (m)<br>3.82 (m)<br>3.83/3.65 (q)<br>3.77 (m)<br>3.73/3.62 (m)<br>3.64 (q)                                                        |
| 63                          | Gluconate           | C9H<br>C7H<br>C5H<br>C3H<br>C2H2                                       | 4.12 (d)<br>4.03 (q)<br>3.77 (m)<br>3.75 (m)<br>3.65/3.81 (m)                                                                         |
| 64                          | Glucose             | C2H<br>C3H<br>C4H<br>C5H<br>C6H<br>C11H2                               | 5.21(d)&4.63(d)<br>3.23(dd)&3.52(dd)<br>3.70(m)&3.48(m)<br>3.40(m)&3.39(m)<br>3.82(m)&3.45(m)<br>3.89(dd)&3.83(dd)&3.75(dd)& 3.71(dd) |
| 65                          | Glucose-1-phosphate | C2H<br>C6H<br>C13H2<br>C4H<br>C3H<br>C5H                               | 5.45 (m)<br>3.90 (m)<br>3.86/3.74 (m)<br>3.77 (m)<br>3.48 (m)<br>3.39 (m)                                                             |
| 66                          | Glycerate           | C3H<br>C2H2                                                            | 4.08 (q)<br>3.81/ 3.72 (dd)                                                                                                           |
| 67                          | Glycerol            | C2H<br>C5H2 & C3H2                                                     | 3.78 (m)<br>3.64 & 3.54 (m)                                                                                                           |
| 68                          | Mannitol            | C2H2/C11H2<br>C3H/C9H<br>C5H/C7H                                       | 3.86/3.65 (q)<br>3.74 (m)<br>3.81 (d)                                                                                                 |
| 69                          | Mannose             | C2H<br>C3H<br>C4H<br>C5H<br>C6H<br>C11H2                               | 5.17/4.89 (d)<br>3.93/3.92 (q)<br>3.84/3.65 (q)<br>3.65/3.56 (q)<br>3.80/3.37 (m)<br>3.90/3.86/3.75/3.72 (q)                          |
| 70                          | myo-Inositol        | C5H<br>C1H/C3H<br>C4H/C6H<br>C2H                                       | 4.07 (t)<br>3.60 (q)<br>3.51 (q)<br>3.28 (t)                                                                                          |
| 71                          | Threonine           | C6H<br>C4H2<br>C8H3                                                    | 4.23 (m)<br>3.58 (d)<br>1.30 (d)                                                                                                      |
| 72                          | Trehalose           | C2H/C8H<br>C4H/C12H<br>C6H/C10H<br>C3H/C13H<br>C5H/C11H<br>C17H2/C19H2 | 5.17 (q)<br>3.84 (q)<br>3.81 (m)<br>3.62 (q)<br>3.42 (q)<br>3.85/3.75 (m)                                                             |
| 73                          | UDP-glucose         | C32H<br>C22H<br>C33H<br>C2H<br>C23H<br>C22H<br>C19H                    | 7.92 (d)<br>5.97 (d)<br>5.96 (d)<br>5.57 (q)<br>4.37 (q)<br>4.35 (q)<br>4.28 (m)                                                      |

|                                   |            |                                                                                                                                                                 |                                                                                                                                                                                                                         |
|-----------------------------------|------------|-----------------------------------------------------------------------------------------------------------------------------------------------------------------|-------------------------------------------------------------------------------------------------------------------------------------------------------------------------------------------------------------------------|
|                                   |            | C18H2<br>C6H<br>C13H<br>C4H<br>C3H<br>C5H                                                                                                                       | 4.18/4.24 (m)<br>3.88 (m)<br>3.85/3.77 (q)<br>3.76 (q)<br>3.53 (m)<br>3.46 (q)                                                                                                                                          |
| 74                                | Xylitol    | C7H/C3H<br>C9H2/C2H2<br>C2H2/C5H2/C9H2                                                                                                                          | 3.81 (dt)<br>3.72 (m)<br>3.64 (m)                                                                                                                                                                                       |
| <b>Vitamins and coenzymes (4)</b> |            |                                                                                                                                                                 |                                                                                                                                                                                                                         |
| 75                                | NAD+       | NiC2H<br>NiC6H<br>NiC4H<br>AdC8H<br>NiC5H<br>AdC2H<br>NiC1'H<br>AdC1'H<br>Ad C2'H<br>NiC4'H<br>AdC3'H<br>NiC2'H<br>NiC3'H<br>AdC4'H<br>NiC5'H<br>AdC5'H         | 9.32 (m)<br>9.12 (m)<br>8.85 (m)<br>8.41 (s)<br>8.19 (m)<br>8.16 (s)<br>6.08 (d)<br>6.03 (d)<br>4.75 (q)<br>4.53 (m)<br>4.49 (q)<br>4.47 (q)<br>4.42 (q)<br>4.36 (m)<br>4.35/4.22m<br>4.25/4.19m                        |
| 76                                | NADP+      | C39H<br>C41H<br>C43H<br>C7H<br>C42H<br>C12H<br>C32H<br>C2H<br>C3H<br>C4H<br>C30H<br>C33H<br>C34H<br>C5H<br>C29H2<br>C19H2                                       | 9.30 (m)<br>9.11 (m)<br>8.80 (m)<br>8.39 (s)<br>8.17 (m)<br>8.14 (s)<br>6.09 (m)<br>6.05 (d)<br>4.99 (m)<br>4.60 (q)<br>4.49 (m)<br>4.45 (q)<br>4.39 (q)<br>4.36 (m)<br>4.31/4.20 (m)<br>4.27/4.18 (m)                  |
| 77                                | NADPH      | AdC8H<br>AdC2H<br>NiC2H<br>NiNH2<br>AdC1'H<br>NiC6H<br>AdC2'H<br>NiC5H<br>NiC1'H<br>AdC3'H<br>AdC4'H<br>AdC5'H<br>NiC3'H<br>NiC2'H<br>NiC4'H<br>NiC5'H<br>NiC4H | 8.48 (s)<br>8.23 (s)<br>6.94 (m)<br>6.61 (s)<br>6.20 (d)<br>5.96 (m)<br>4.97 (m)<br>4.81 (m)<br>4.74 (d)<br>4.59 (q)<br>4.37 (m)<br>4.26/4.18 (m)<br>4.20 (q)<br>4.15 (q)<br>4.04 (m)<br>4.04/4.01 (m)<br>2.85/2.76 (m) |
| 78                                | Pyridoxine | C6H<br>C9H2<br>C11H2<br>C7H3                                                                                                                                    | 7.65 (s)<br>4.81 (s)<br>4.73 (s)<br>2.45 (s)                                                                                                                                                                            |

| <b>Choline derivatives (2)</b> |                             |                                                            |                                                                                |
|--------------------------------|-----------------------------|------------------------------------------------------------|--------------------------------------------------------------------------------|
| 79                             | O-Phosphocholine            | C3H2<br>C4H2<br>C3H3/C6H3/C10H3                            | 4.15 (m)<br>3.58 (m)<br>3.20 (t)                                               |
| 80                             | sn-Glycero-3-phosphocholine | C3H2<br>C9H<br>C8H2<br>C4H2<br>C15H2<br>C6H3, C13H3, C14H3 | 4.30 (m)<br>3.90 (m)<br>3.94/3.86 (m)<br>3.65 (m)<br>3.61/3.67 (q)<br>3.20 (t) |
| <b>Alcohols (2)</b>            |                             |                                                            |                                                                                |
| 81                             | Ethylene glycol             | C1H2&C2H2                                                  | 3.64 (s)                                                                       |
| 82                             | Isopropanol                 | C2H<br>C3H3 & C4H3                                         | 4.01 (m)<br>1.16 (d)                                                           |
| <b>Amide (1)</b>               |                             |                                                            |                                                                                |
| 83                             | Acetamide                   | NH2<br>CH3                                                 | 7.53/6.79 (t)<br>2.00 (d)                                                      |
